# Supplementary material
Source: PubMed Central journal article supplement (PMC5038589)

**Fig. S1**

**A**

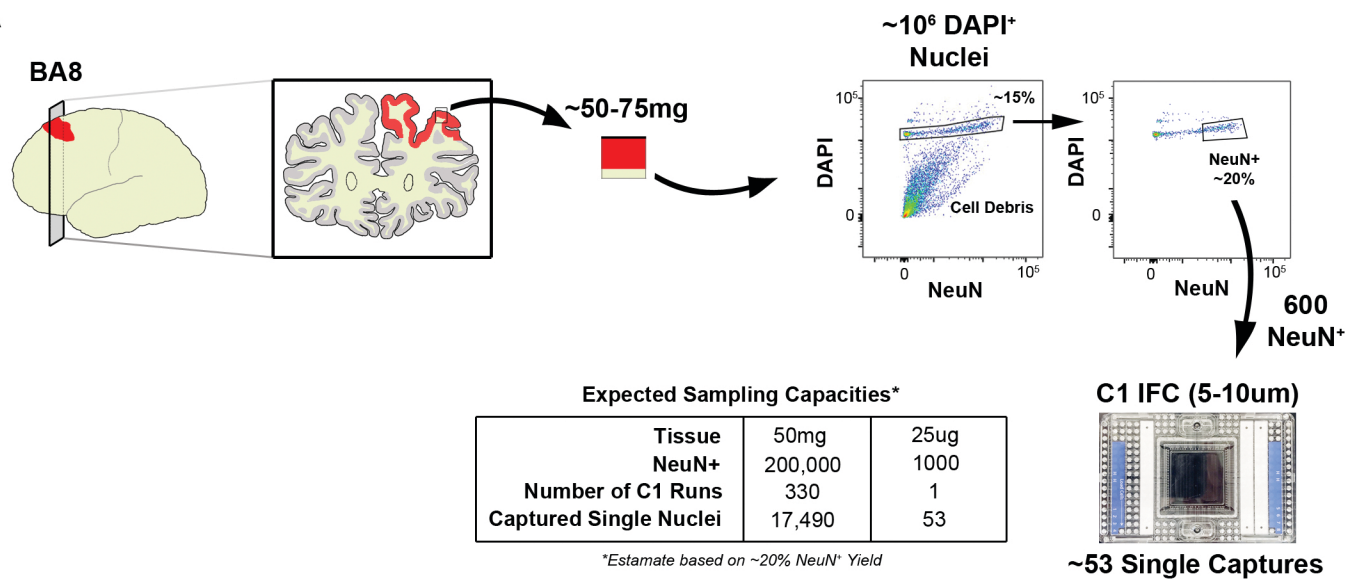

**B**

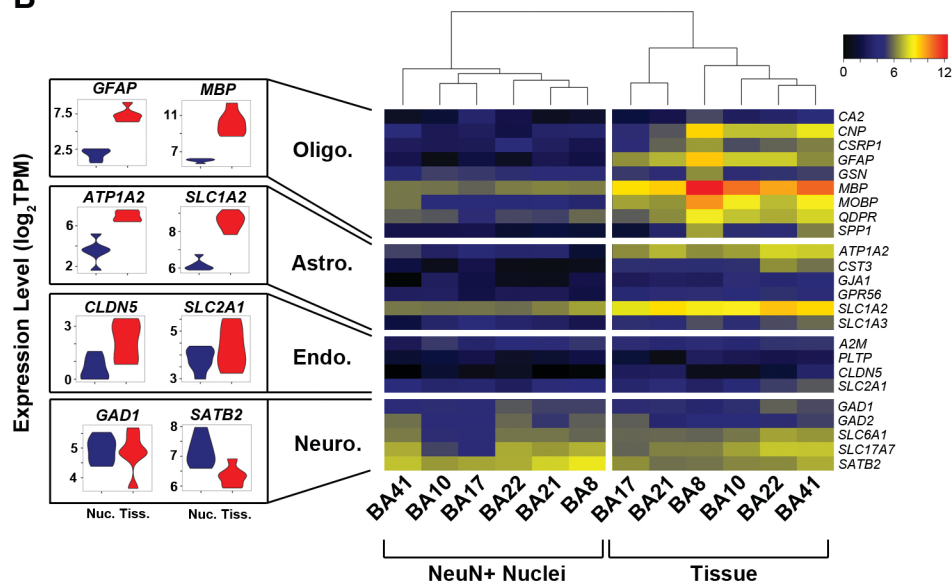

**C**

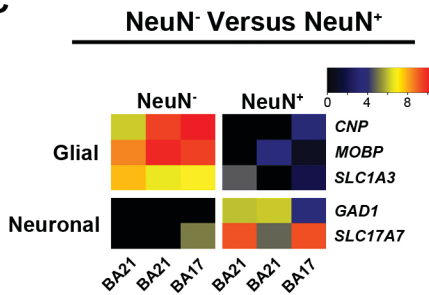

**D**

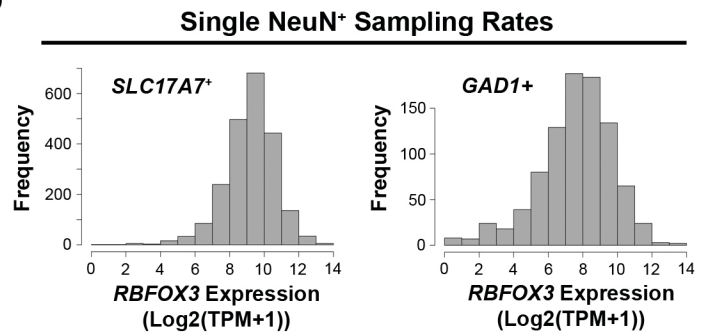

**Fig. S2**

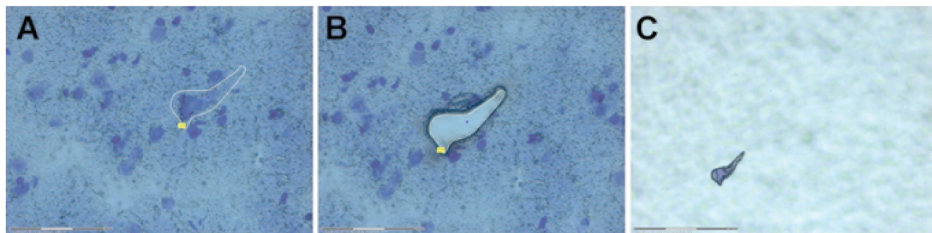

**D**

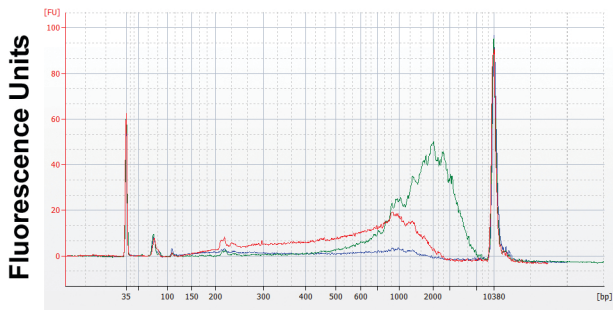

- 100 Cells Hand Cut
- 100 Cells LCM
- 1000pg Positive Control

**Size (Base Pairs)**

**Fig. S3**

**Transcript Coverage (0-1 kb)**

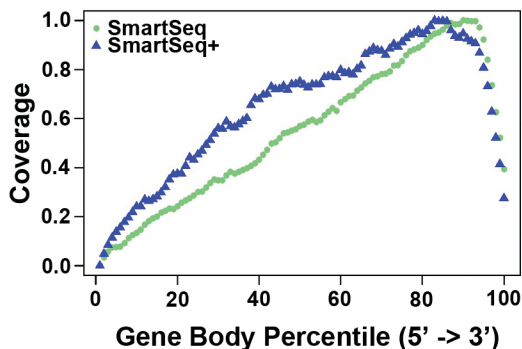

**Transcript Coverage (1-2 kb)**

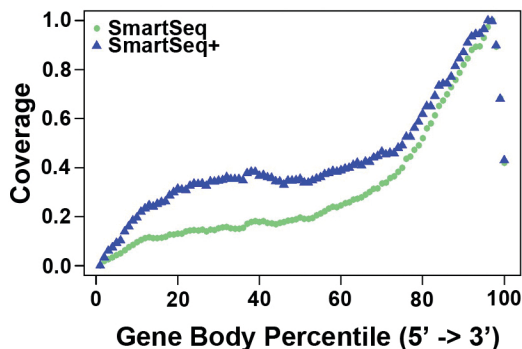

**Transcript Coverage (2-3 kb)**

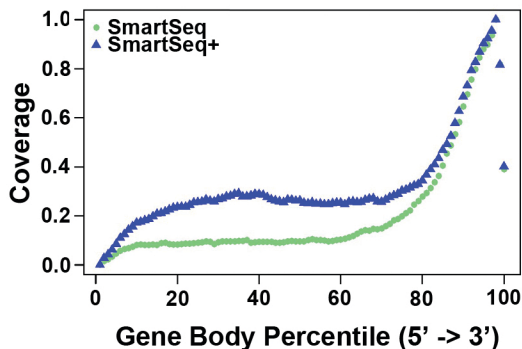

**Transcript Coverage (3-4 kb)**

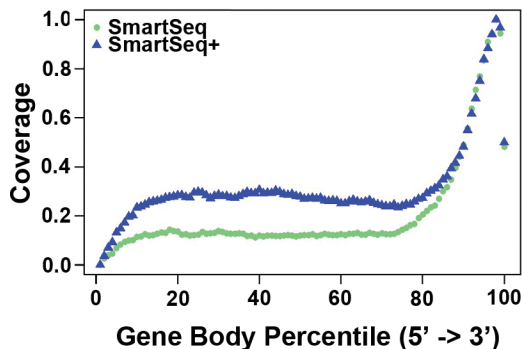

**Fig. S4**

**A**

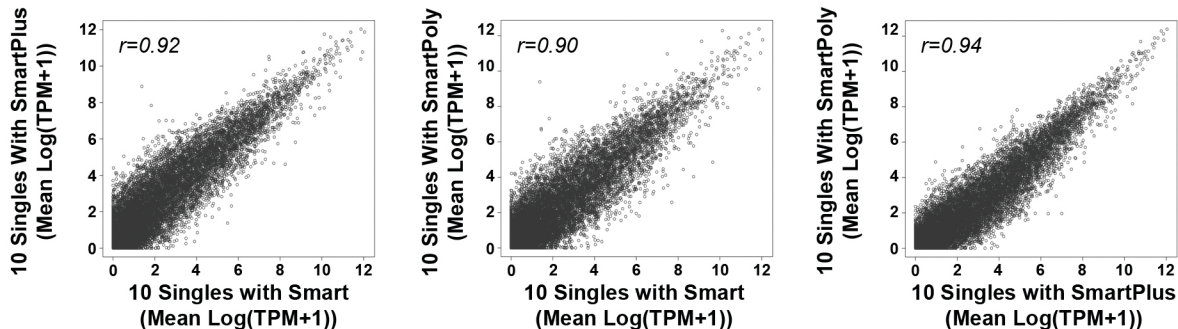

**B**

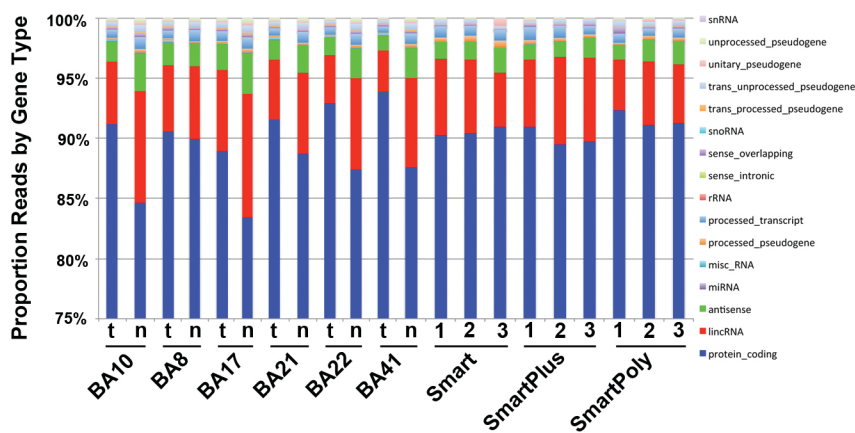

**C**

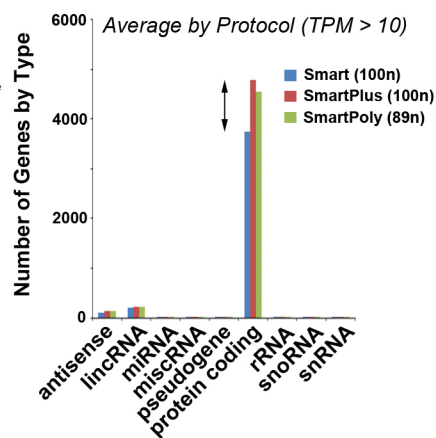

**D**

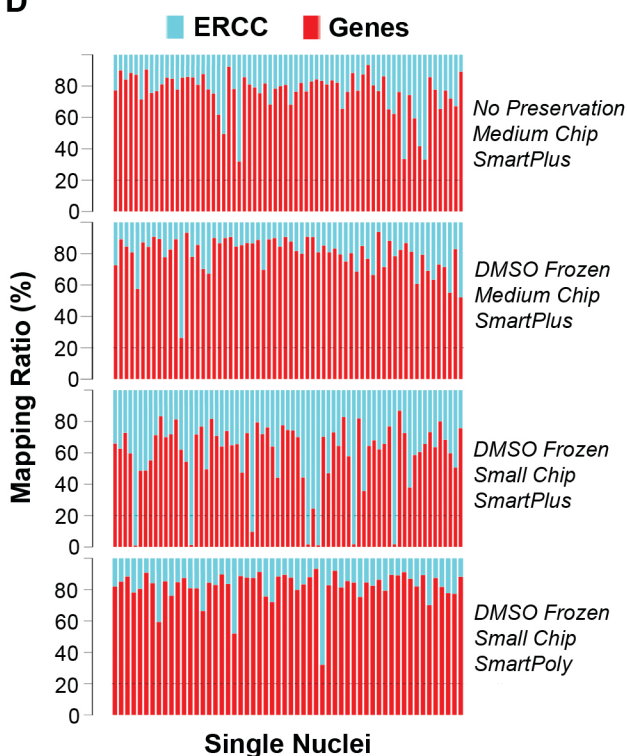

**E**

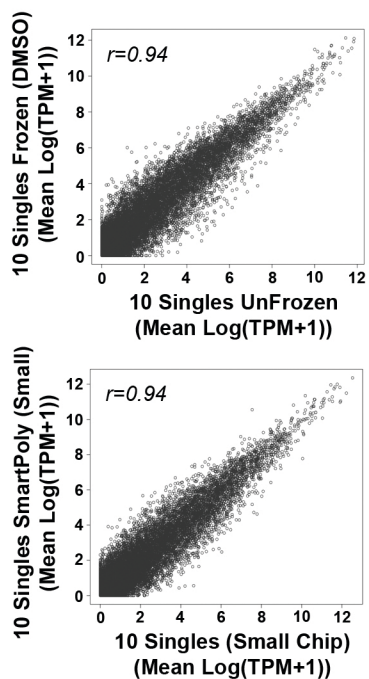

**F**

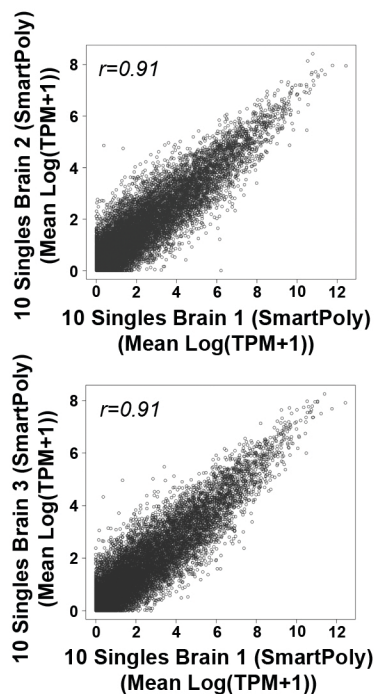

**Fig. S5****A****Mapping Statistics**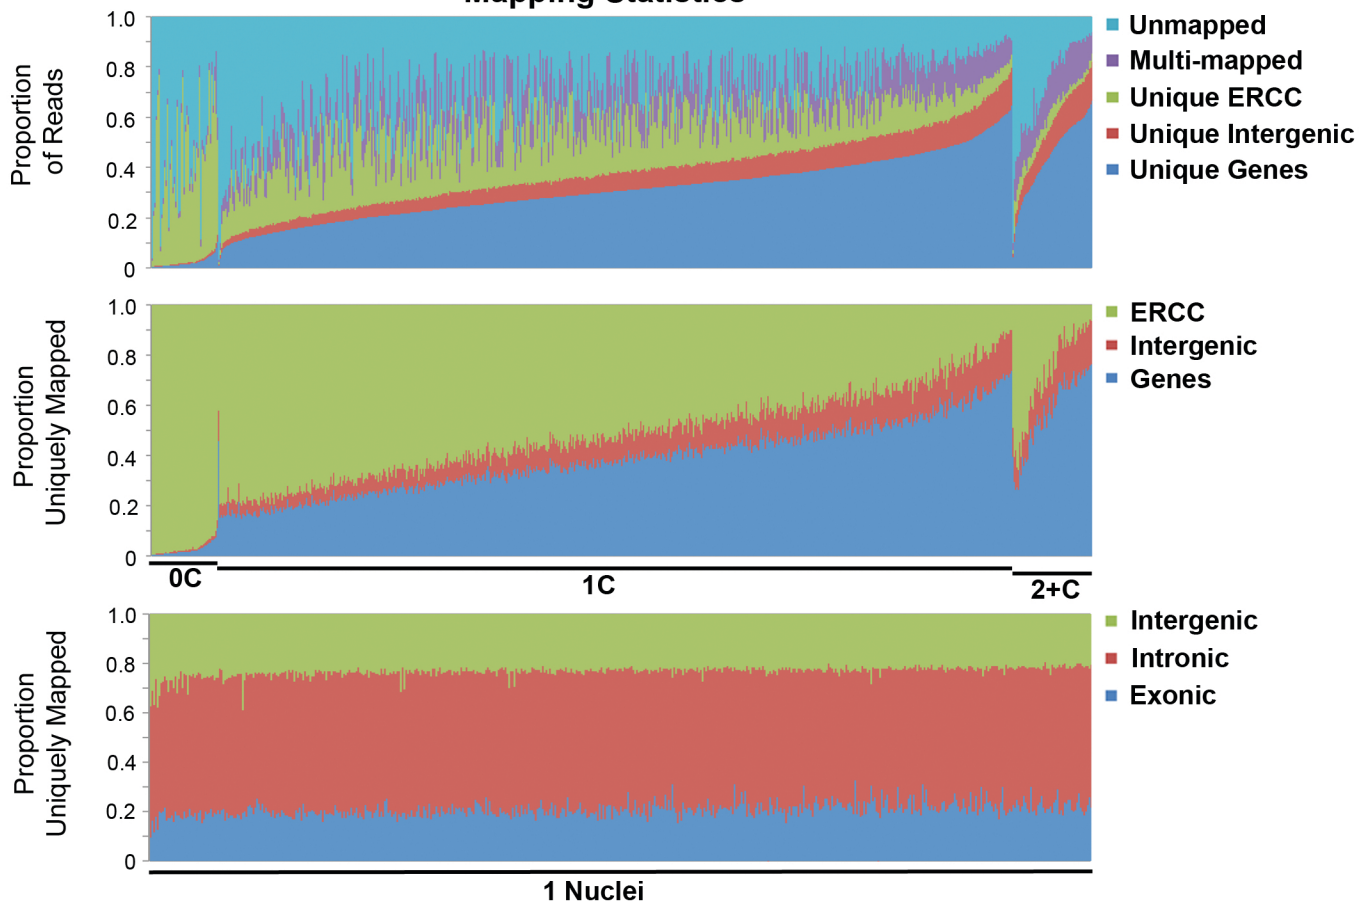**B**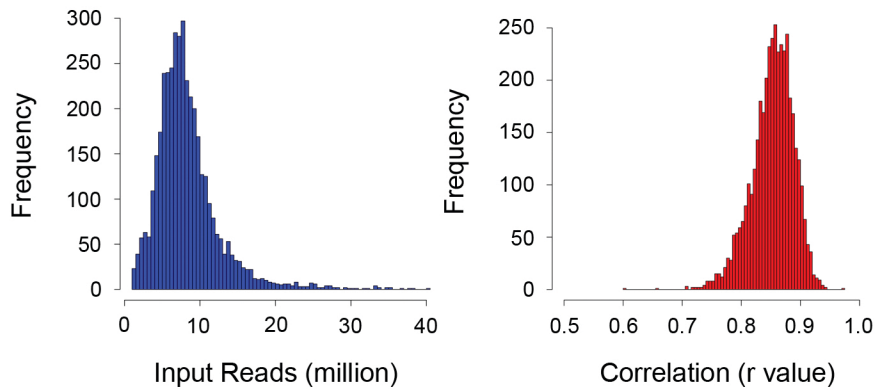**C**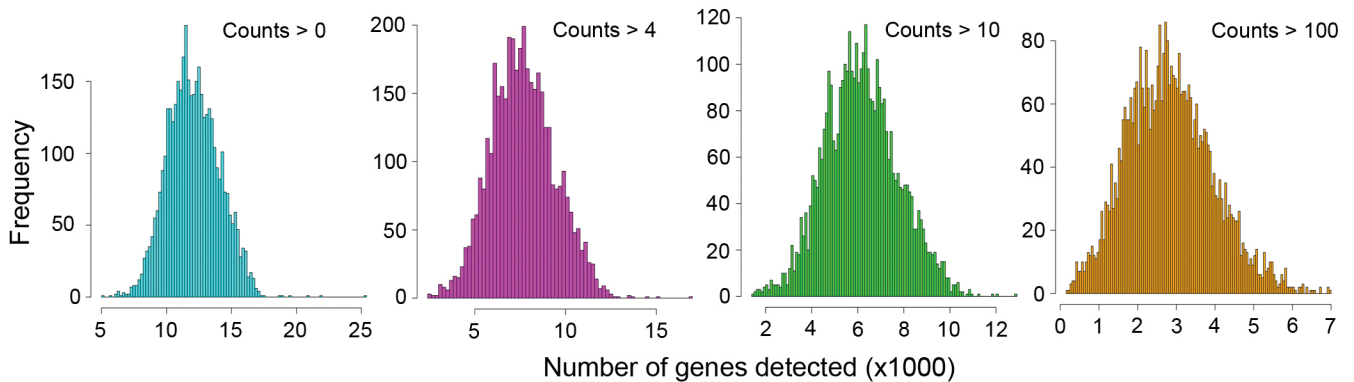

**Fig. S6**

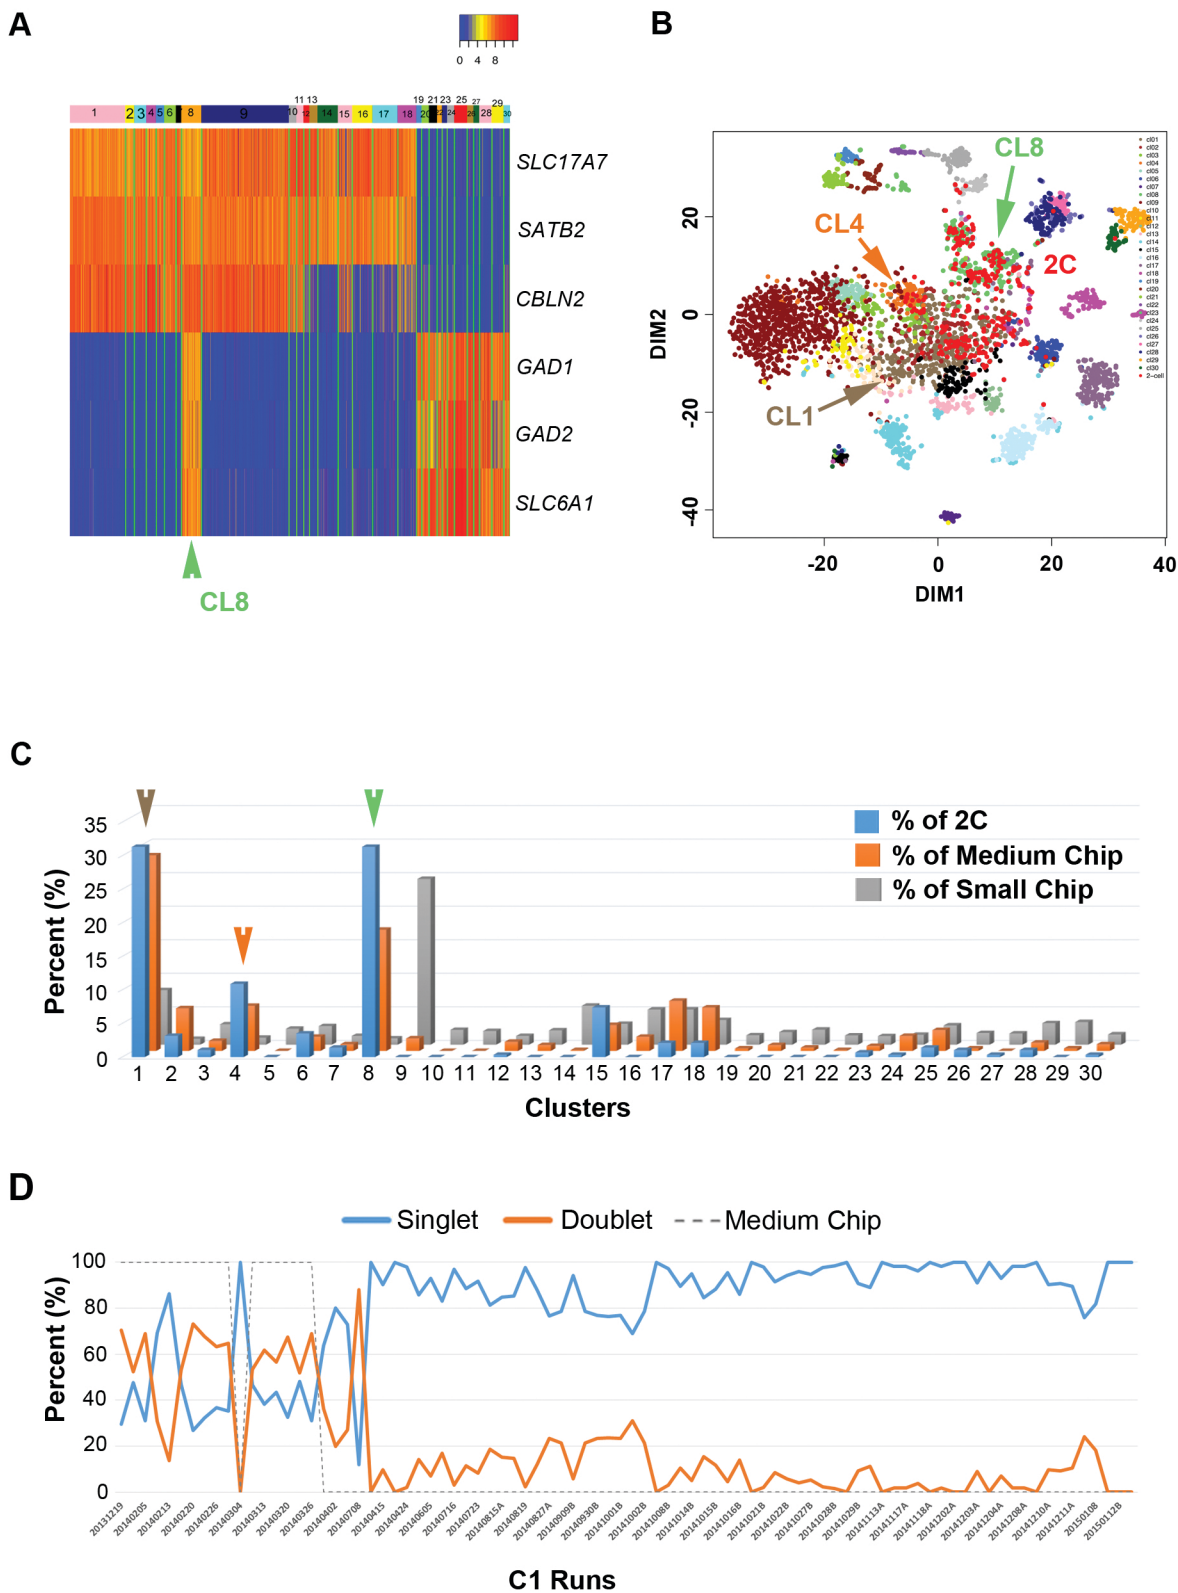

**Fig. S7**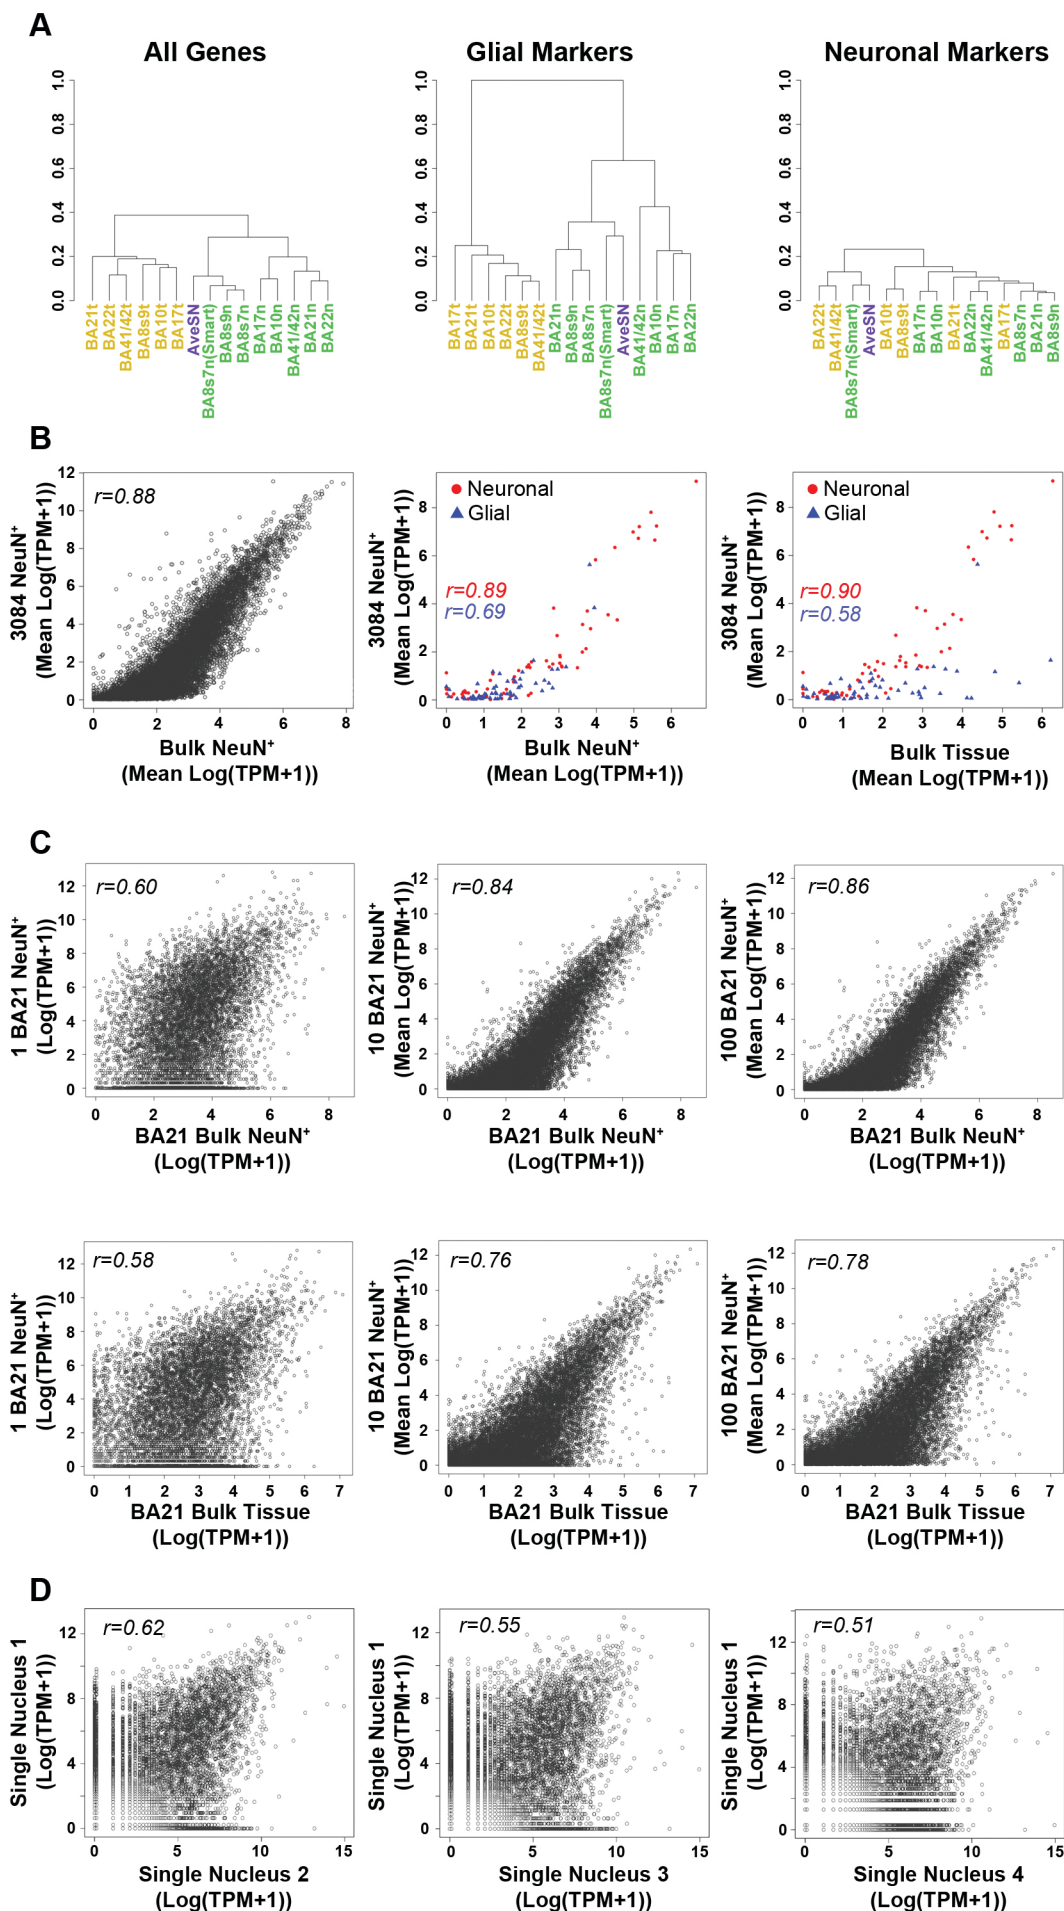

Fig. S8

A

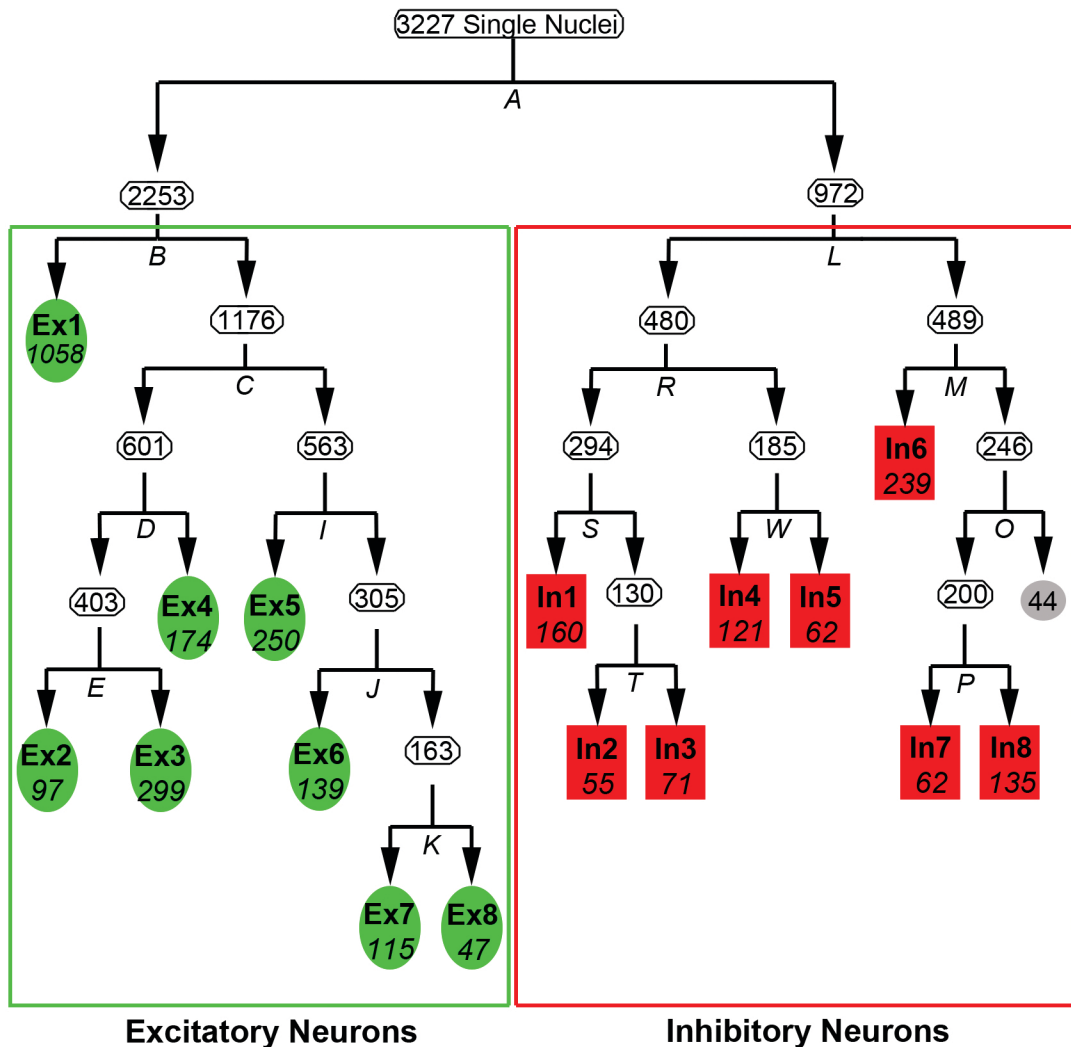

B

Ex Group DEG GO Analysis

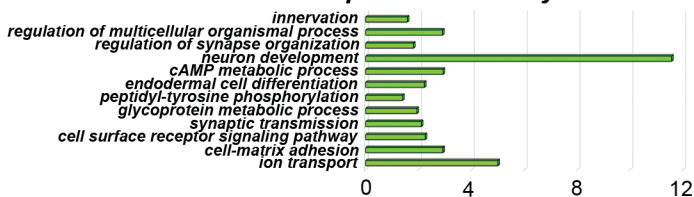

In Group DEG GO Analysis

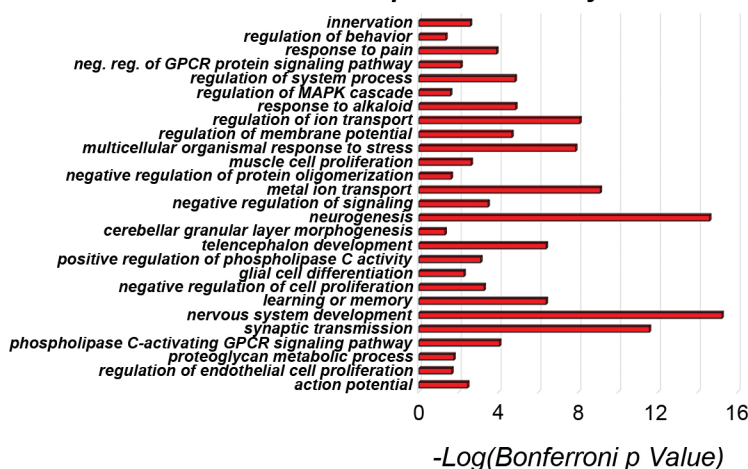

C

DEGs Across Splittings

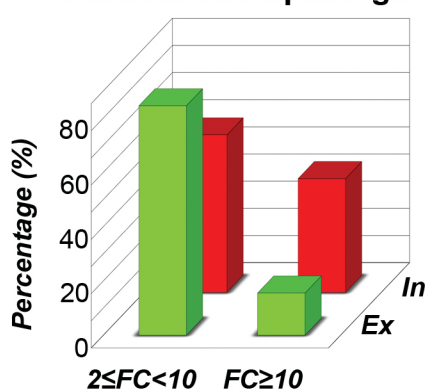



Fig. S9

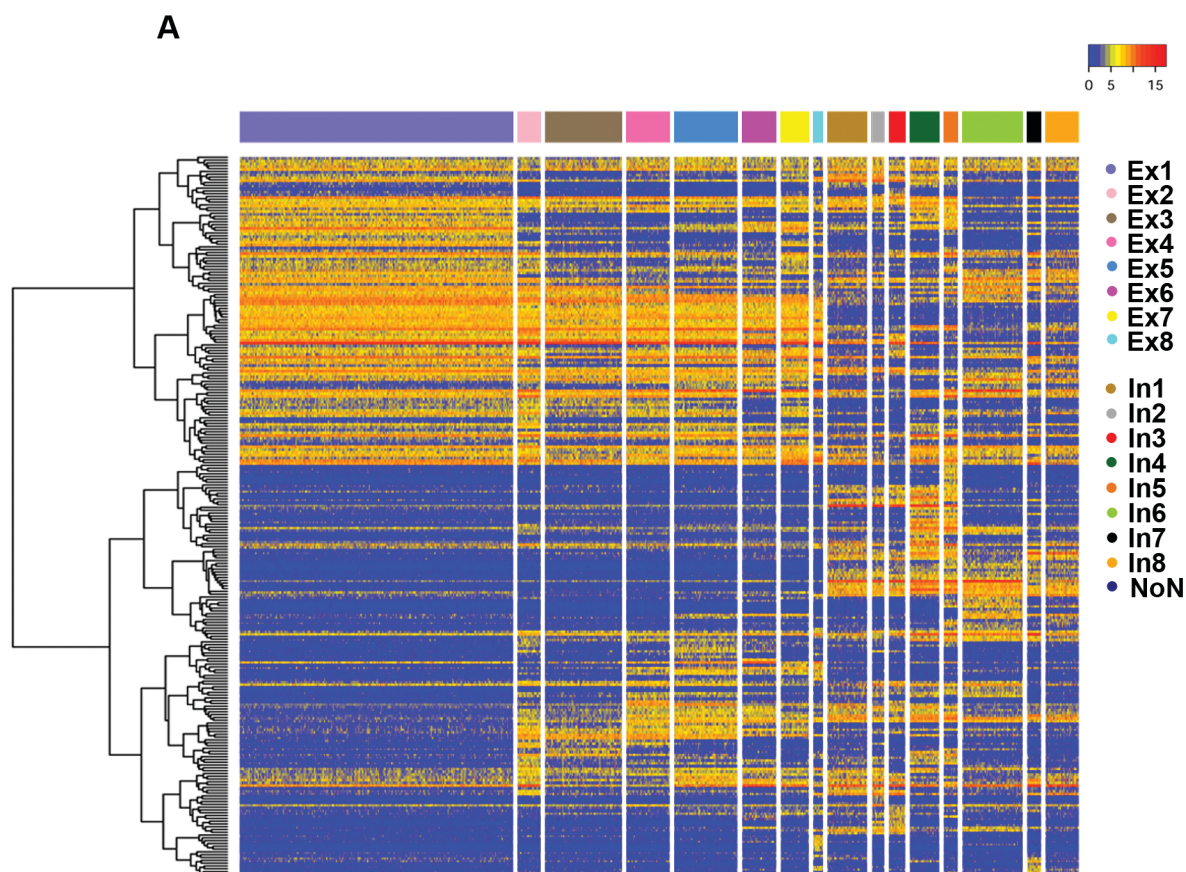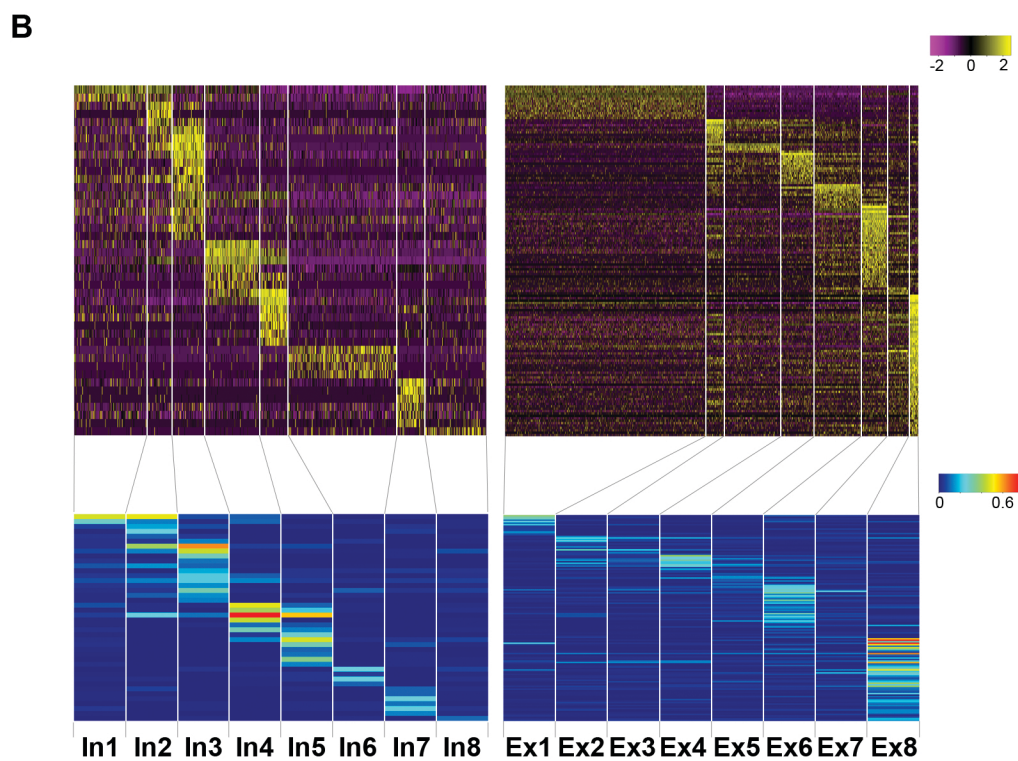

Fig. S10

A

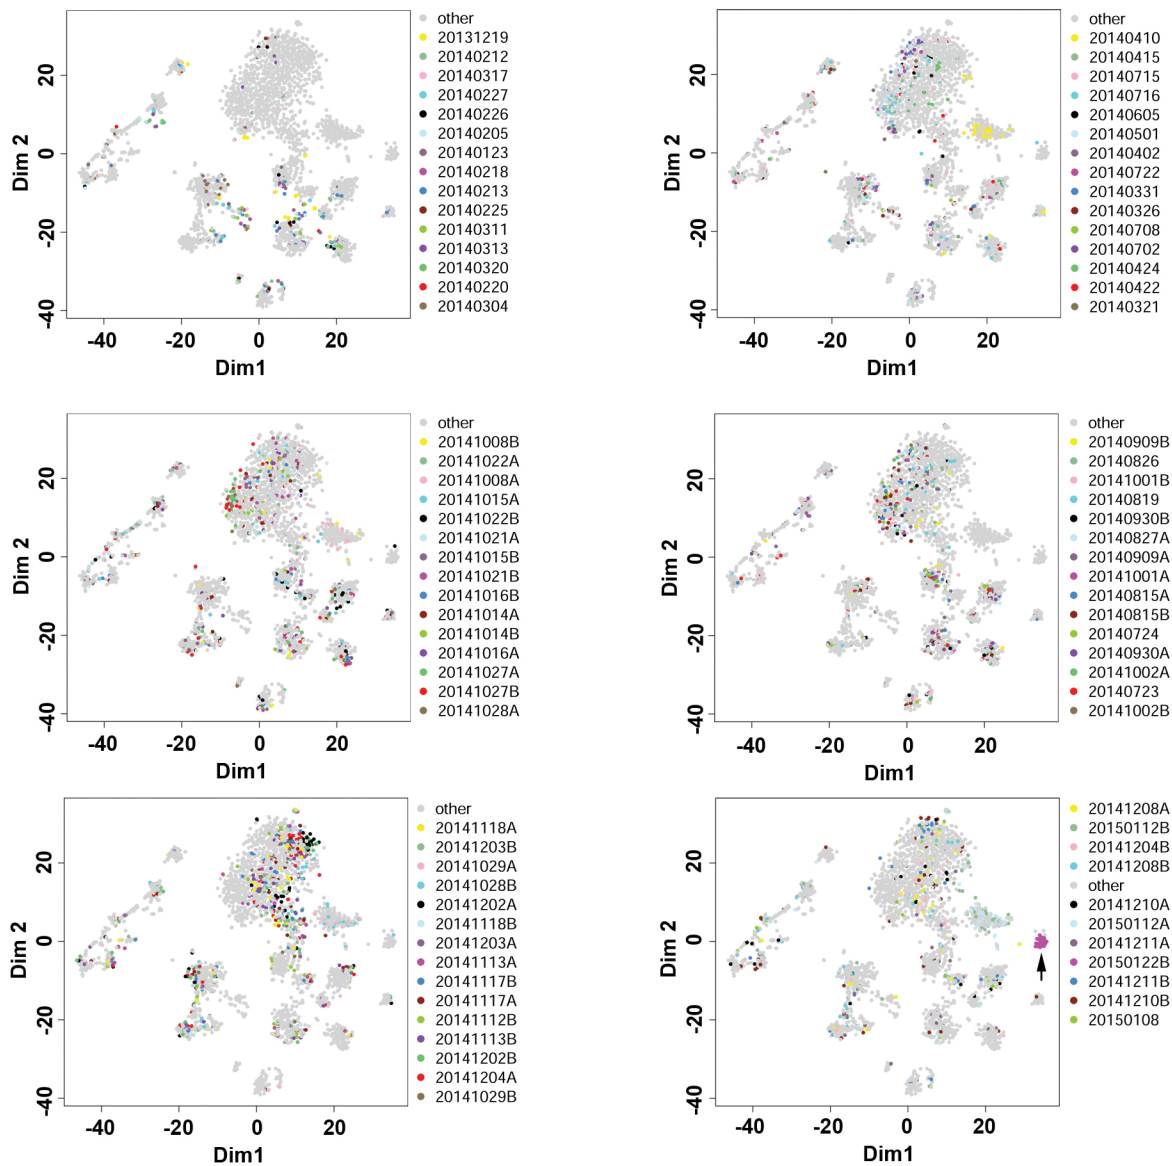

B

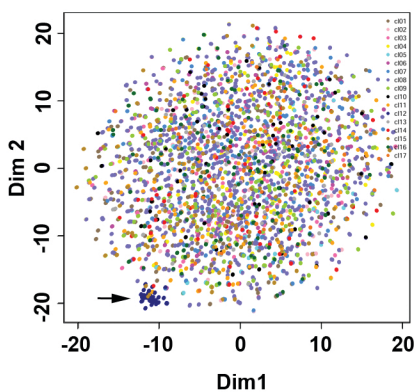

**Fig. S11**

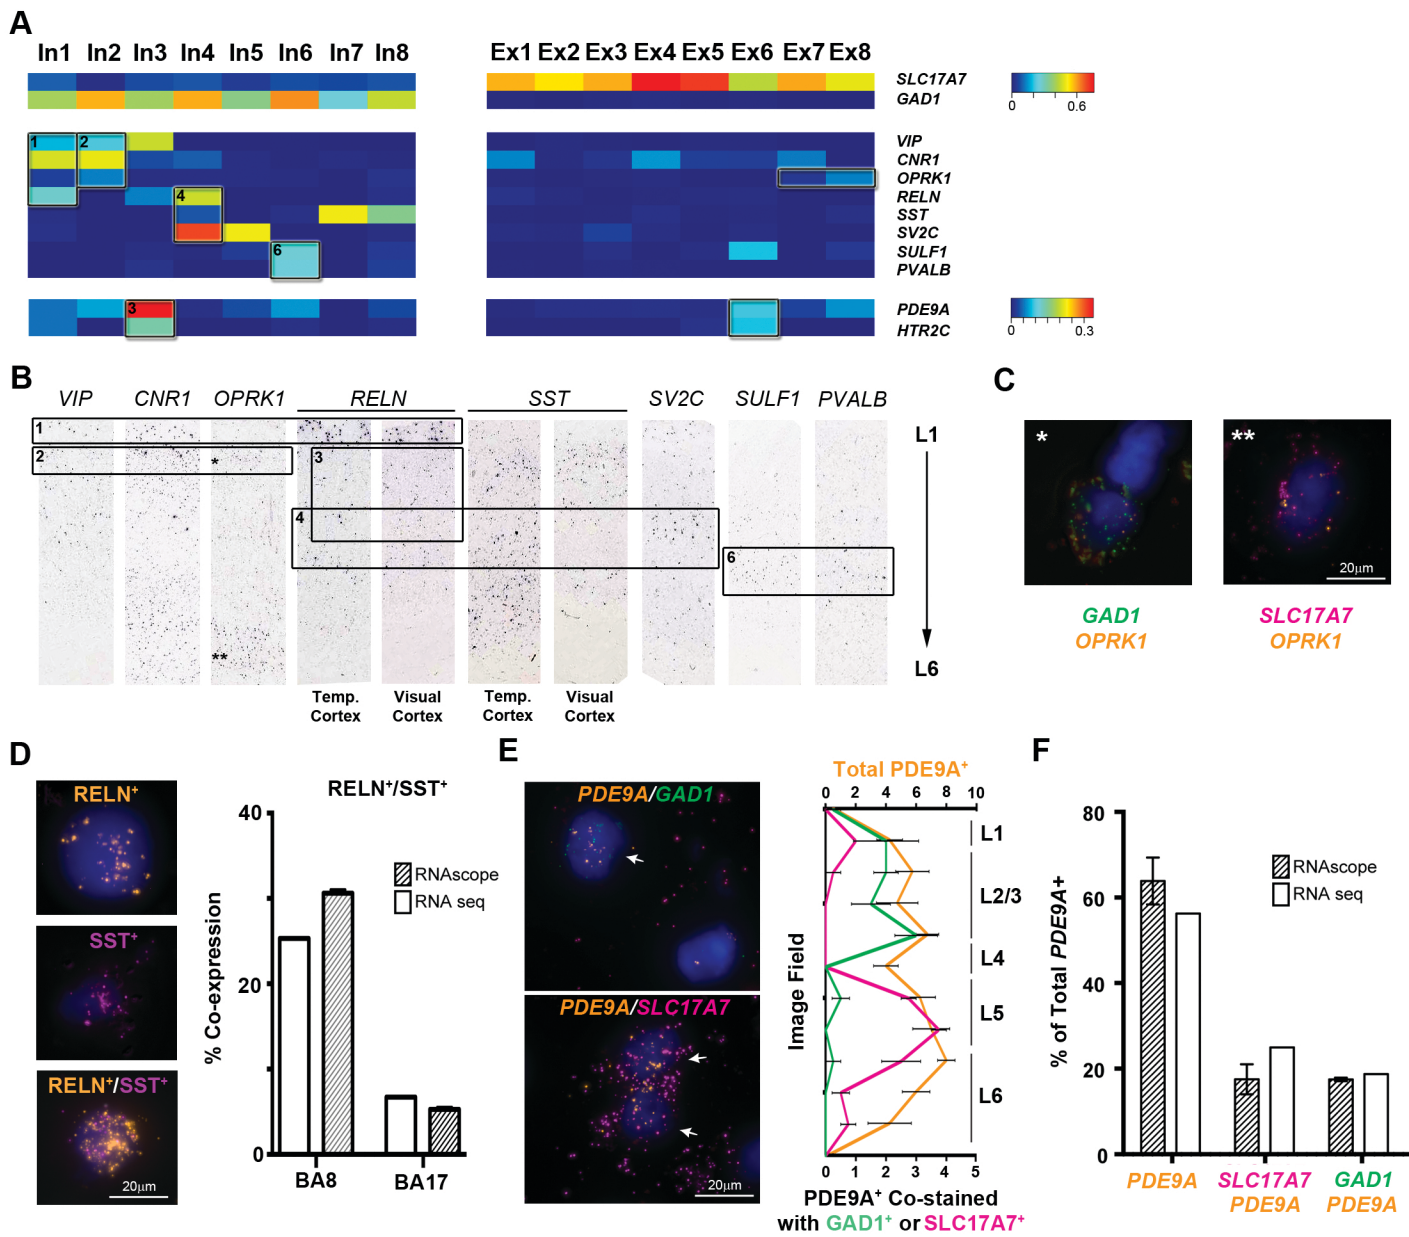

Fig. S12

A

Inhibitory Neurons

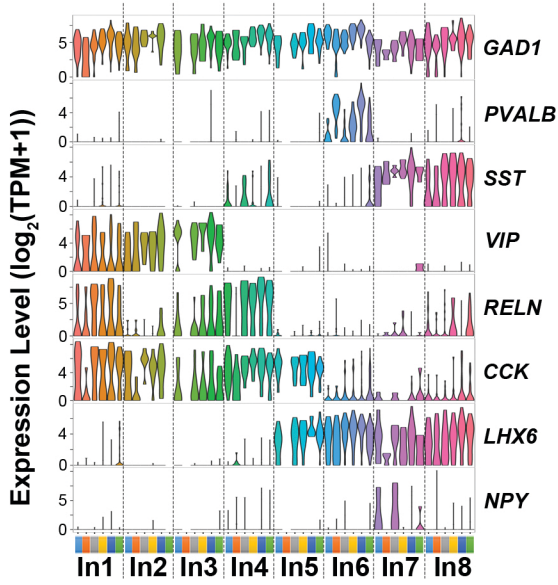

Combinatorial Marker Profiles

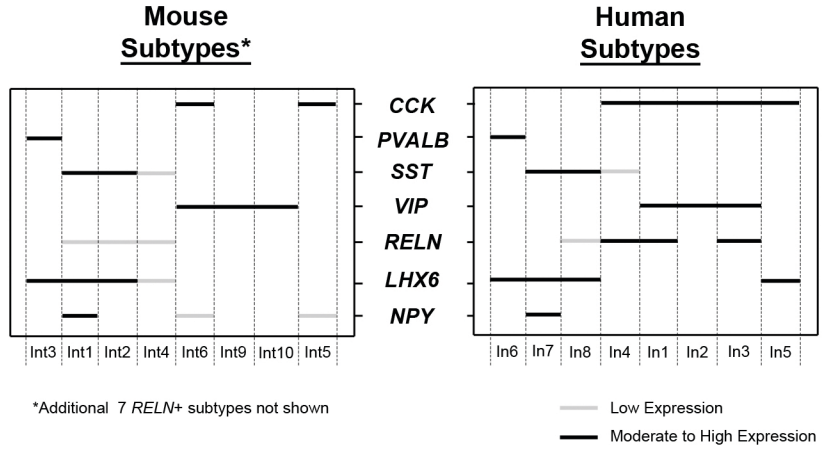

B

Excitatory Neurons

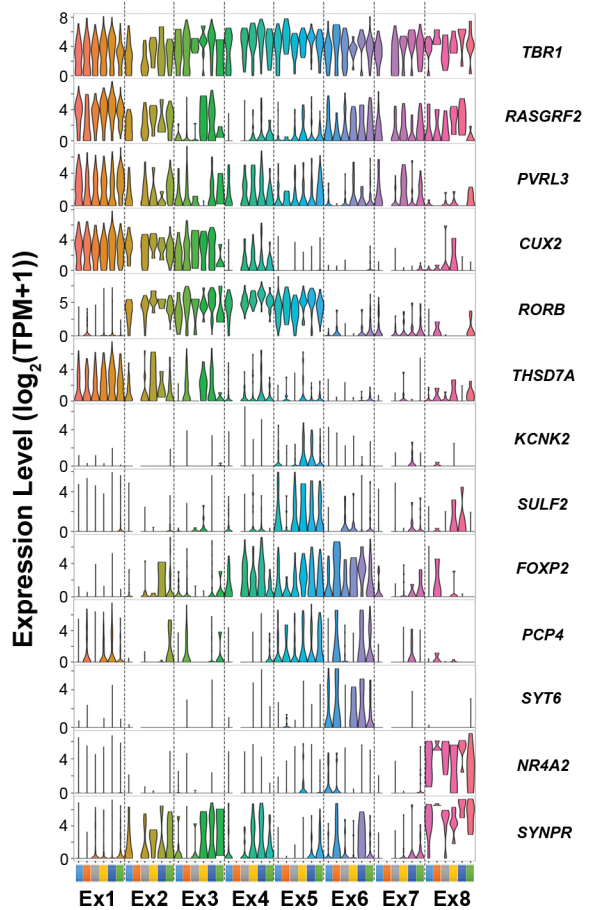

RNA ISH (human)

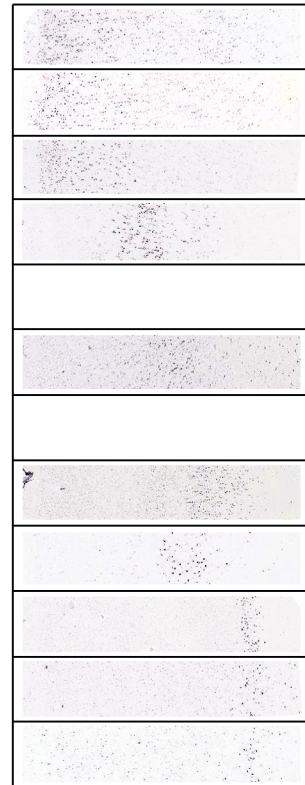

ISH Region    Mouse Pattern    Human Pattern

| Gene    | ISH Region      | Mouse Pattern | Human Pattern |
|---------|-----------------|---------------|---------------|
| TBR1    | Temporal Cortex | L2/3/4/5a     | L2-6          |
| RASGRF2 | Temporal Cortex | L2/3/5a       | L2-6          |
| PVRL3   | Temporal Cortex | L2-5a         | L2-4          |
| CUX2    | Temporal Cortex | L4-5a         | L4-5          |
| RORB    | Temporal Cortex | L5a           | L2-4          |
| THSD7A  | Temporal Cortex | L5a           | L5            |
| KCNK2   | Temporal Cortex | L5            | L5            |
| SULF2   | Temporal Cortex | L6            | L5/6          |
| FOXP2   | Temporal Cortex | L5-6b         | L5            |
| PCP4    | Visual Cortex   | L6            | L6b           |
| SYT6    | Visual Cortex   | ClauPyr       | L6b           |
| NR4A2   | Temporal Cortex | ClauPyr       | L6b           |
| SYNPR   | Temporal Cortex |               |               |

■ BA10   ■ BA17   ■ BA21   ■ BA22   ■ BA41/42   ■ BA8

**Fig. S13**

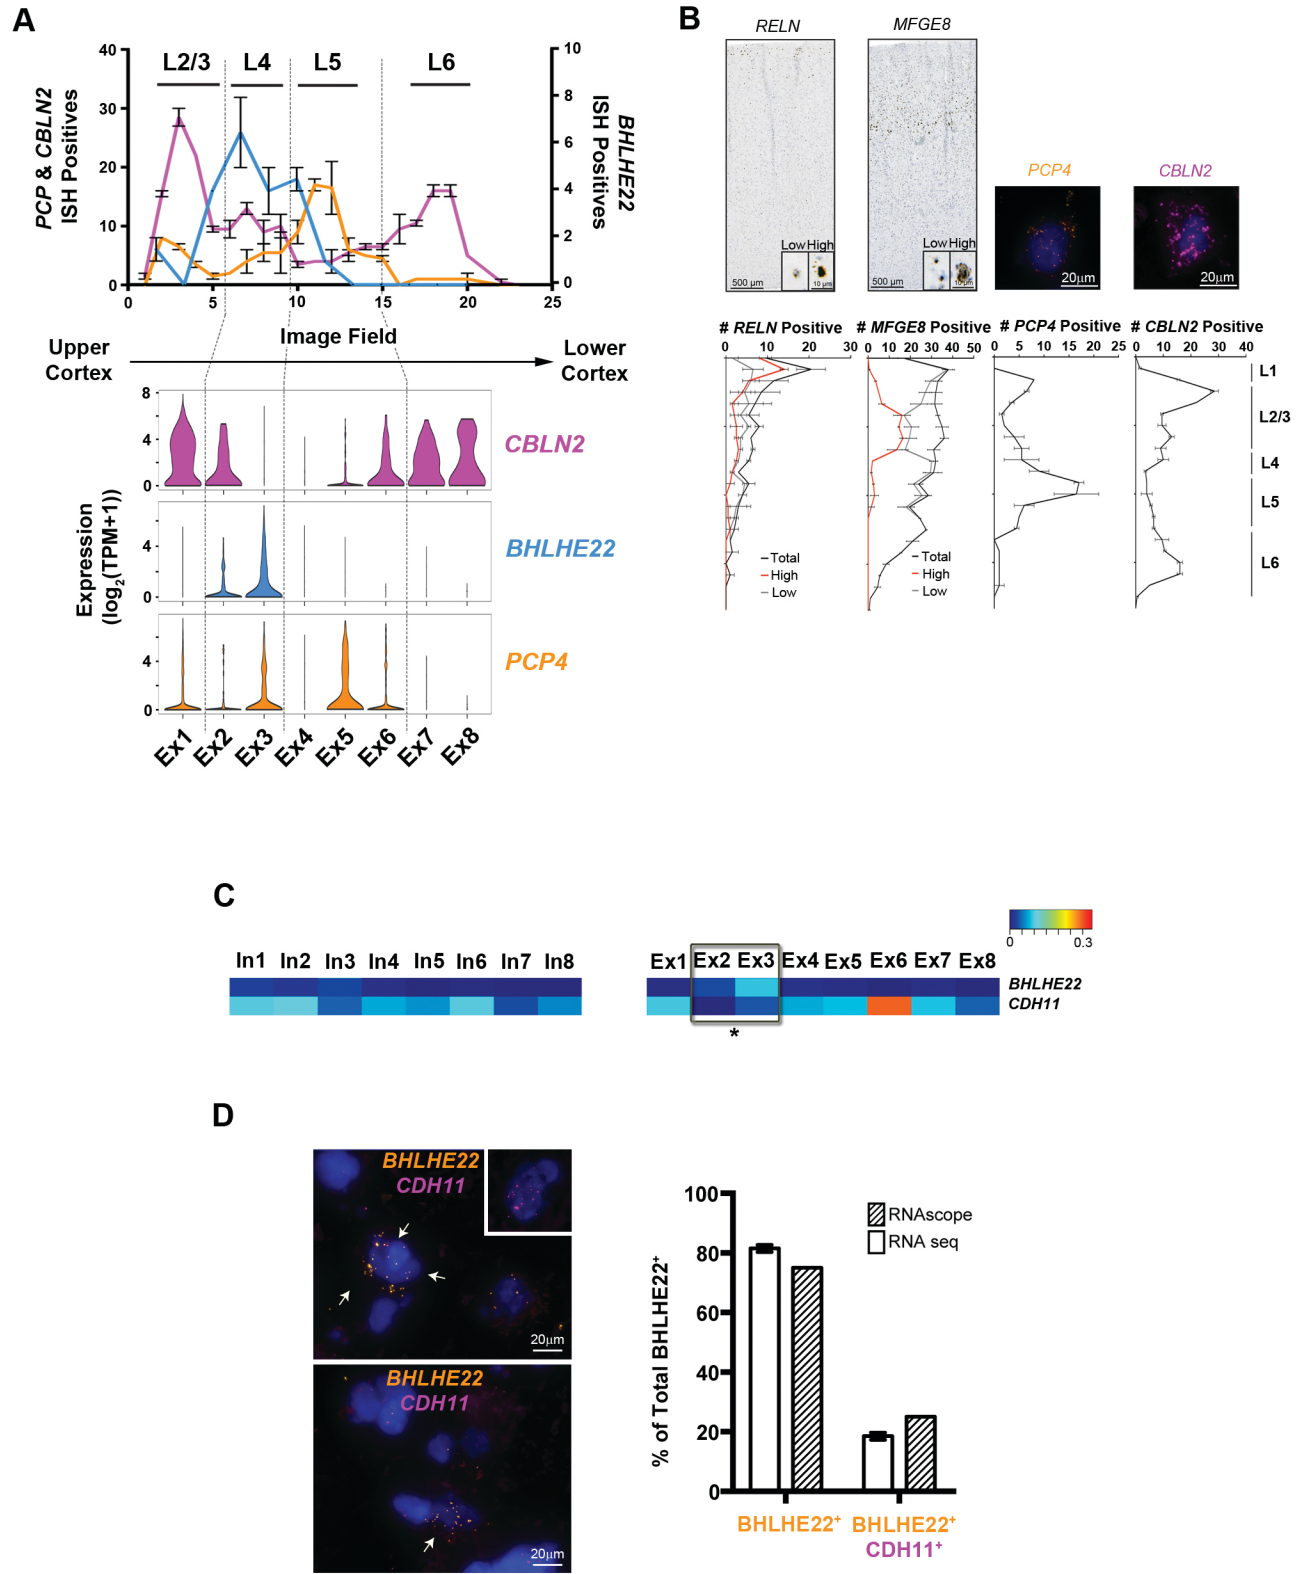

**Fig. S14**

**A**

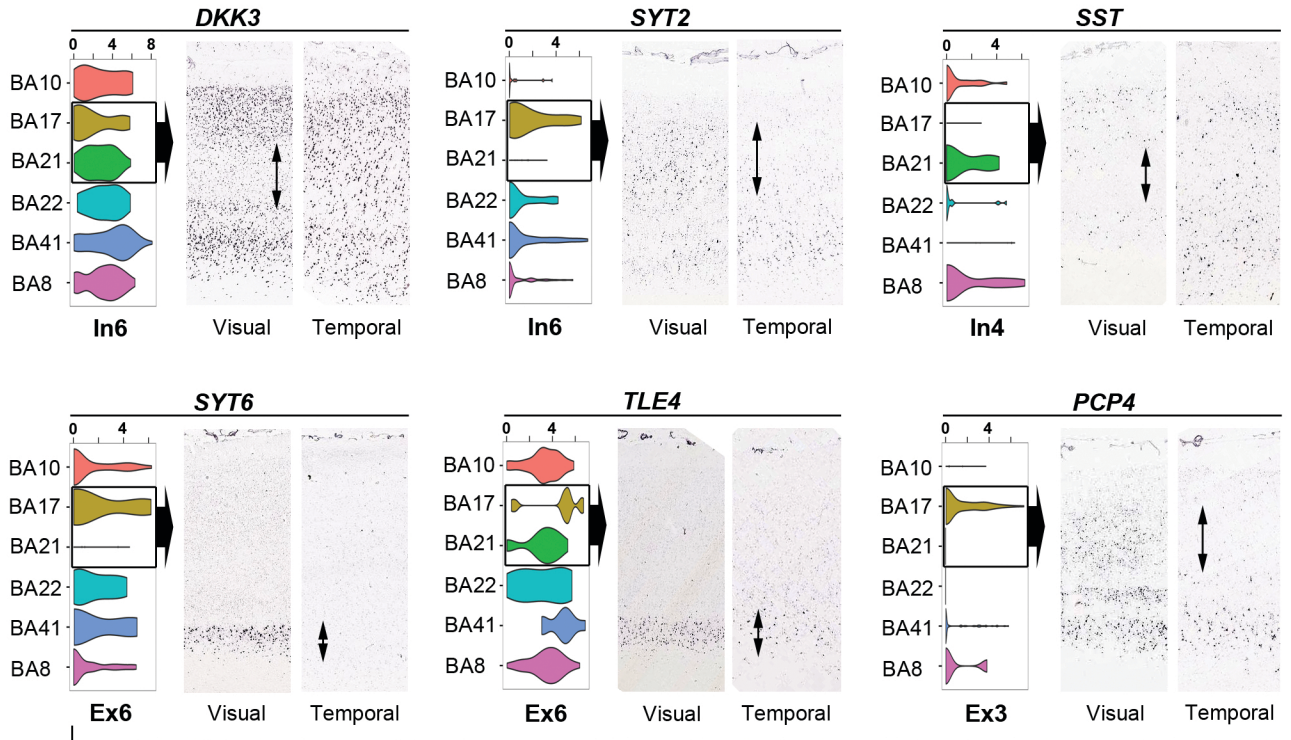

**BA17 (Visual Cortex) vs BA21 (Temporal Cortex)**

**B**

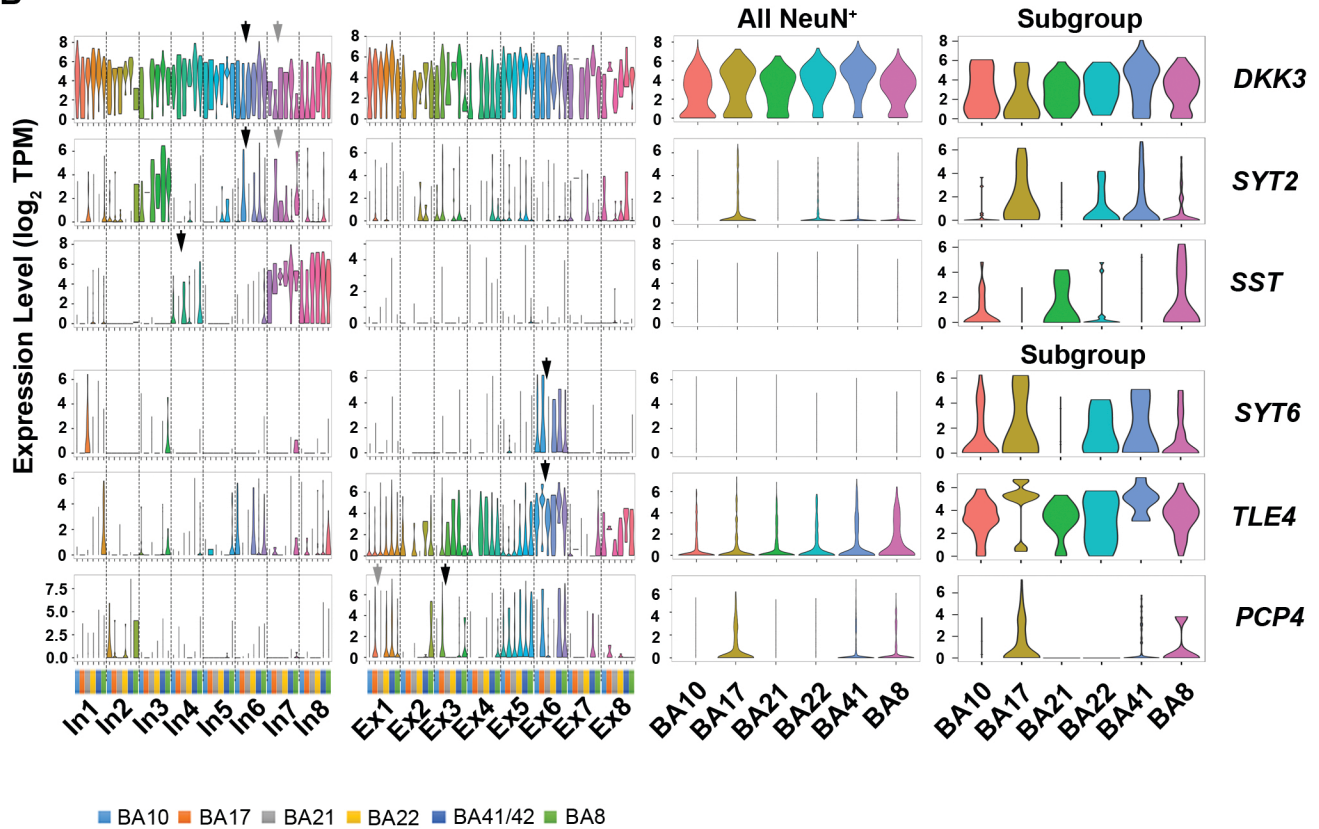

**Fig. S15**

**A**

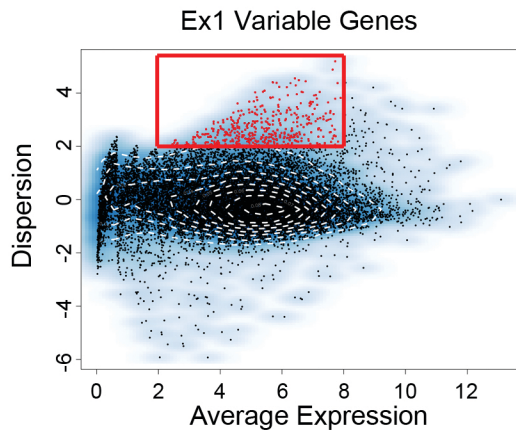

**B**

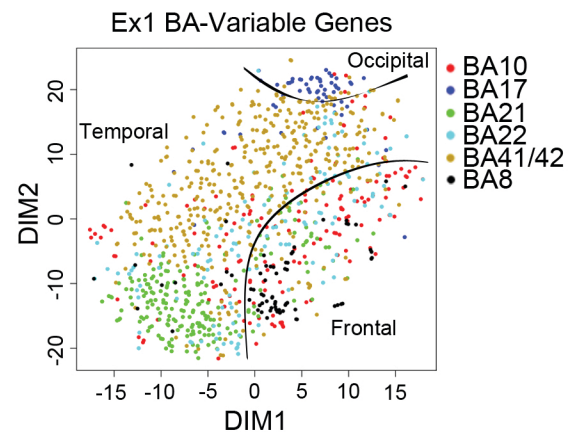

**C**

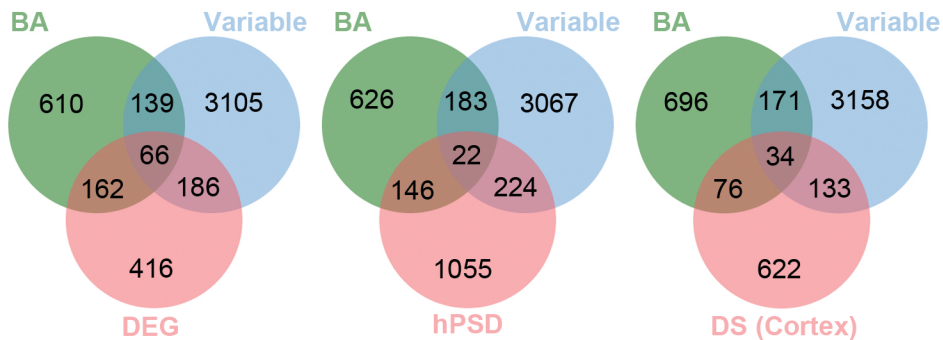

Fig. S16

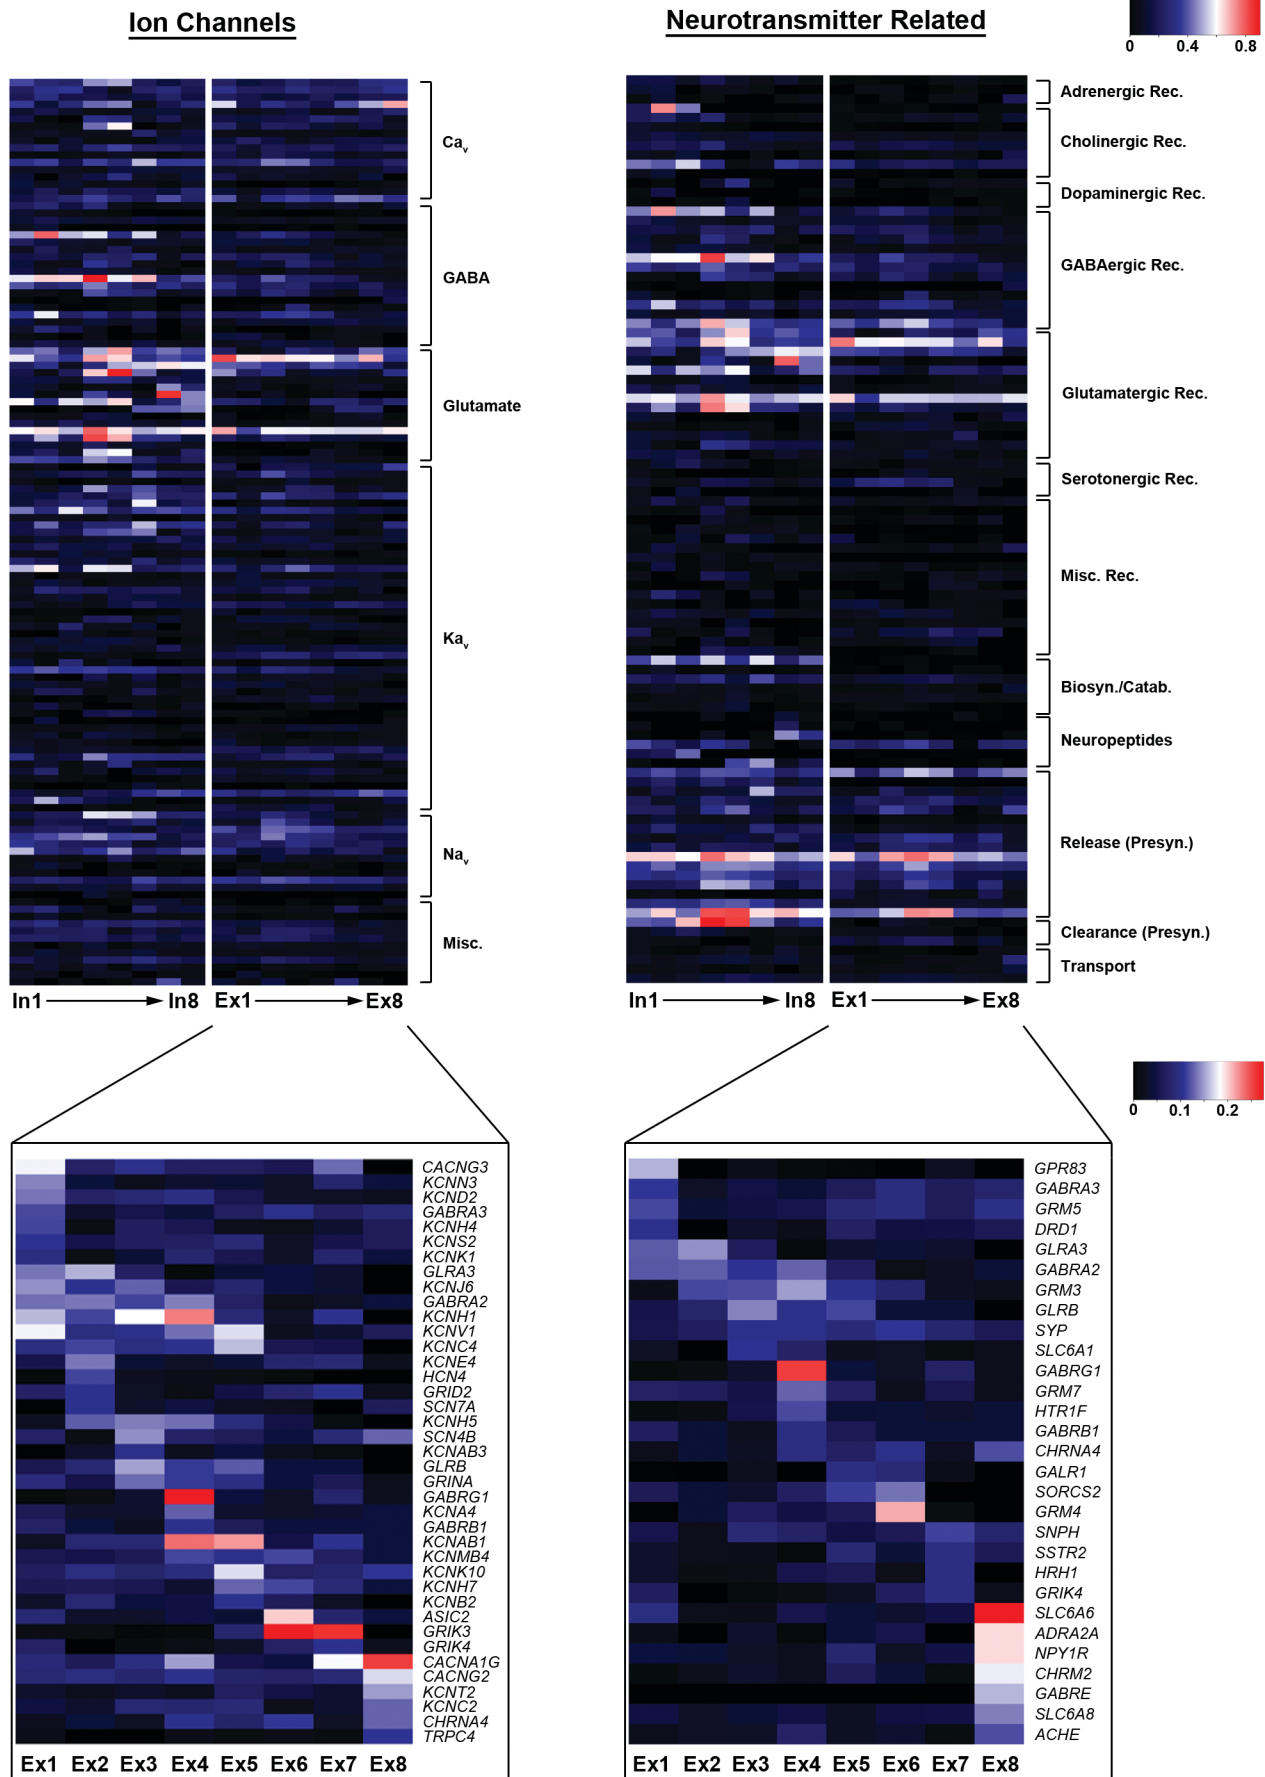

Supplement: NIHMS807586-supplement-SuppFigures.pdf [file NIHMS807586-supplement-SuppFigures.pdf]
